# Supplementary material for: Genetic variation of CYP2C19 affects both pharmacokinetic and pharmacodynamic responses to clopidogrel but not prasugrel in aspirin-treated patients with coronary artery disease
Source: PubMed Central journal article supplement — Eur Heart J. 2009 May 9;30(14):1744–52. doi: 10.1093/eurheartj/ehp157 (PMC2709885; doi:10.1093/eurheartj/ehp157), 2009-05-09
Supplement: ehp157_1.pdf [file ehp157_1.pdf]

### Supplemental Tables

Table 1-Summary of pharmacodynamic responses measured by VASP assay after clopidogrel and prasugrel administration (Mean ± SE)

| Time        | Pras EM ± SE | Pras RM ± SE | P value EM vs RM | Clop EM ± SE | Clop RM ± SE | P value EM vs RM |
|-------------|--------------|--------------|------------------|--------------|--------------|------------------|
| Day 1 0hr   | 80.41 ± 0.85 | 82.22 ± 0.63 |                  | 81.93 ± 0.88 | 82.85 ± 1.98 |                  |
| Day 1 1hr   | 20.54 ± 3.7  | 13.95 ± 4.71 | 0.2535           | 69.34 ± 2.97 | 72.71 ± 4.77 | 0.64             |
| Day 1 2 hr  | 11.24 ± 2.37 | 6.6 ± 1.37   | 0.2469           | 57.69 ± 3.71 | 56.12 ± 8.57 | 0.8052           |
| Day 1 24 hr | 11.97 ± 1.34 | 10.53 ± 2.29 | 0.2515           | 51.2 ± 3.74  | 65.96 ± 6.25 | 0.011            |
| Day 14 0hr  | 22.47 ± 1.54 | 31.27 ± 3.5  | 0.2279           | 48.96 ± 2.77 | 64.24 ± 4.21 | 0.0024           |
| Day 29 0hr  | 23.38 ± 2.01 | 34.54 ± 4.39 | 0.1855           | 48.28 ± 2.97 | 66.12 ± 5.65 | 0.0037           |

Table 2-Summary of pharmacodynamic responses measured by VNP2Y12 device (PRU) after clopidogrel and prasugrel administration (Mean ± SE)

| Time        | Pras EM ± SE  | Pras RM ± SE  | P value EM vs RM | Clop EM ± SE   | Clop RM ± SE   | P value EM vs RM |
|-------------|---------------|---------------|------------------|----------------|----------------|------------------|
| Day 1 0hr   | 299.57 ± 7.09 | 291.2 ± 11.29 |                  | 301.95 ± 6.2   | 267.56 ± 14.39 |                  |
| Day 1 2hr   | 13 ± 2.6      | 27.31 ± 18.46 | 0.6562           | 157.94 ± 14.78 | 174.44 ± 25.57 | 0.2254           |
| Day 1 24hr  | 17.37 ± 2.86  | 26.62 ± 13.95 | 0.8207           | 141.74 ± 14.56 | 183.00 ± 18.97 | 0.0069           |
| Day 14 0 hr | 52.06 ± 6.98  | 90.8 ± 17.33  | 0.1424           | 162.32 ± 11.93 | 201.00 ± 14.48 | 0.0138           |
| Day 29 0hr  | 62.32 ± 7.46  | 92.2 ± 23.06  | 0.5996           | 161.08 ± 14.46 | 208.78 ± 18.46 | 0.0153           |

Table 3-Summary of ratio or difference for PK and PD responses for CYP2C19, CYP2B6, CYP2C9 and CYP3A5

| CYP gene | Treatment | AUC ratio LD (RM/EM) | P values | %PRI LD (EM-RM) | P value | %PRI MD D14 (EM-RM) | P value | %PRI MD D29 (EM-RM) | P value |
|----------|-----------|----------------------|----------|-----------------|---------|---------------------|---------|---------------------|---------|
| CYP2C9   | Clop      | 0.8933293            | 0.3734   | -12.0696        | 0.0669  | -7.0586             | 0.2024  | -12.2676            | 0.0577  |
| CYP3A5   | Clop      | 0.8254719            | 0.0686   | -6.2312         | 0.2724  | 1.4874              | 0.7549  | -2.4508             | 0.6572  |
| CYP2B6   | Clop      | 1.09505              | 0.3539   | 6.9794          | 0.1795  | -0.3944             | 0.9275  | 3.3628              | 0.5168  |
| CYP2C19  | Clop      | 0.7045472            | 0.0015   | -15.0198        | 0.011   | -15.0164            | 0.0024  | -17.7248            | 0.0037  |
| CYP2C9   | Pras      | 1.032311             | 0.7792   | 1.1056          | 0.8506  | 6.8508              | 0.1683  | 9.3688              | 0.1054  |
| CYP3A5   | Pras      | 1.185305             | 0.2839   | 9.2816          | 0.2701  | 6.1628              | 0.3834  | 19.3252             | 0.0195  |
| CYP2B6   | Pras      | 0.9916352            | 0.9246   | 0.011           | 0.9981  | -1.8962             | 0.6255  | 0.4668              | 0.9205  |
| CYP2C19  | Pras      | 0.9573368            | 0.6361   | 5.7914          | 0.2515  | -5.0418             | 0.2279  | -6.5788             | 0.1855  |

Clop=clopidogrel, Pras=prasugrel, LD=loading dose, MD=maintenance dose, AUC = area under the concentration-time curve; EM = extensive metaboliser; RM = reduced metaboliser, PRI = platelet reactivity index; PRU = P2Y12 reaction unit.
